# Supplementary material
Source: publisher site journal article supplement (https://www.dovepress.com/article/364692)
Supplement: Supplementary file 1 [file get_supplementary_file.php]

**Appendix table 1 Selection of all classes of medications with and without signal in change of pulmonary outcomes from P1 to P2 through Knockoff method**

| **Classes of medications** | **Change of Emphysema selection a** | **Change of FEV1 selection a** | **Change of FEV1_pp selection a** | **Change of FVC selection a** |
| --- | --- | --- | --- | --- |
| P1 Biguanides | 1 | 1 | 1 | 1 |
| P1 Bromocriptine | 0 | 0 | 0 | 0 |
| P1 Thiazolidinediones | 0 | 0.08 | 0 | 0 |
| P1 Sulfonylureas | 0 | 0 | 0 | 0 |
| P1 Meglitinides | 0 | 0 | 0 | 0 |
| P1 AGIS | 0 | 0.01 | 0 | 0 |
| P1 Incretin mimetics | 0.34 | 0.01 | 0.09 | 0 |
| P1 Amylin analogues | 0 | 0 | 0 | 0 |
| P1 Gout treatment | 0 | 0 | 0 | 0 |
| P1 PPI | 0 | 0.01 | 0 | 0 |
| P1 H2 blocker | 0 | 0 | 0 | 0 |
| P1 Prostaglandin | 0 | 0 | 0 | 0 |
| P1 ACEi | 0 | 0 | 0 | 0 |
| P1 ARB | 0 | 0 | 0 | 0 |
| P1 Beta blocker | 0 | 0 | 0 | 0 |
| P1 Diuretic | 0 | 0.1 | 0 | 0 |
| P1 Ca channel blocker | 0 | 0 | 0 | 0 |
| P1 Alpha blocker | 0 | 0 | 0 | 0 |
| P1 A2RA | 0 | 0 | 0 | 0 |
| P1 Alpha and Beta | 0 | 0 | 0 | 0 |
| P1 Central agonist | 0 | 0 | 0 | 0 |
| P1 PAI | 0 | 0 | 0 | 0 |
| P1 Vasodilator | 0 | 0 | 0 | 0 |
| P1 Statin | 0 | 0 | 0 | 0 |
| P1 Statin combo | 0 | 0.01 | 0 | 0 |
| P1 SCAI | 0.66 | 0 | 0 | 0 |
| P1 Resins | 0.01 | 0 | 0 | 0 |
| P1 Fibrates | 0 | 0 | 0 | 0 |
| P1 O3FAEE | 0 | 0.01 | 0 | 0 |
| P1 NSAID | 0 | 0 | 0 | 0 |
| P1 TCA | 0 | 0 | 0 | 0 |
| P1 SSRI | 0 | 0 | 0 | 0 |
| P1 SNRI | 0 | 0 | 0 | 0 |
| P1 MAOI | 0 | 0 | 0 | 0 |
| P1 DRI | 0 | 0.04 | 0 | 0 |
| P1 Other antidepressants | 0 | 0 | 0 | 0 |
| P1 Mood stabilizers | 0.07 | 0.01 | 0 | 0.03 |
| P1 Anxiolytic-hypnotics | 0 | 0.01 | 0 | 0 |
| P1 Antipsychotics | 0 | 0 | 0 | 0 |
| P1 Stimulants | 0 | 0 | 0 | 0 |
| P1 Other psychological treatment | 0 | 0 | 0 | 0 |
| P1 Antiplatelet | 0 | 0 | 0 | 0 |
| P2 Biguanides | 0 | 0 | 0 | 0 |
| P2 Bromocriptine | 0 | 0 | 0 | 0 |
| P2 Thiazolidinediones | 0 | 0 | 0 | 0 |
| P2 Sulfonylureas | 0 | 0 | 0 | 0 |
| P2 Meglitinides | 0 | 0 | 0 | 0 |
| P2 AGIS | 0 | 0 | 0 | 0 |
| P2 Incretin mimetics | 0 | 0 | 0 | 0 |
| P2 Amylin analogues | 0 | 0 | 0 | 0 |
| P2 Gout treatment | 0 | 0 | 0 | 0 |
| P2 ACEi | 0 | 0 | 0 | 0 |
| P2 ARB | 0 | 0 | 0 | 0 |
| P2 Beta blocker | 0 | 0.01 | 0 | 0 |
| P2 Diuretic | 0.66 | 1 | 1 | 1 |
| P2 Ca channel blocker | 0 | 0 | 0 | 0 |
| P2 Alpha blocker | 0 | 0 | 0 | 0 |
| P2 A2RA | 0 | 0 | 0 | 0 |
| P2 Alpha and Beta | 0 | 0.91 | 0.19 | 0.14 |
| P2 Central agonist | 0 | 1 | 0.99 | 0.81 |
| P2 PAI | 0 | 0 | 0 | 0 |
| P2 Vasodilator | 0 | 0 | 0 | 0 |
| P2 Statin | 0 | 0 | 0 | 0 |
| P2 Statin combo | 0 | 0 | 0 | 0 |
| P2 SCAI | 0 | 0 | 0 | 0 |
| P2 Resins | 0 | 0.02 | 0 | 0 |
| P2 Fibrates | 0 | 0 | 0 | 0 |
| P2 O3FAEE | 0 | 0 | 0 | 0 |
| P2 Antiplatelet | 0 | 0 | 0 | 0 |
| P2 PPI | 0.1 | 0.01 | 0 | 0 |
| P2 H2 blocker | 0.16 | 0.75 | 0.03 | 0 |
| P2 Prostaglandin | 0 | 0.07 | 0.19 | 0 |
| P2 TCA | 0.71 | 0.19 | 0.02 | 0.82 |
| P2 SSRI | 0 | 0 | 0 | 0 |
| P2 SNRI | 0 | 0.01 | 0.08 | 0 |
| P2 MAOI | 0 | 0 | 0 | 0 |
| P2 DRI | 0 | 0.09 | 0.04 | 0 |
| P2 Other antidepressants | 0.04 | 0.01 | 0 | 0 |
| P2 Anxiolytic-hypnotics | 0 | 0 | 0 | 0 |
| P2 Antidepressants | 0.07 | 0 | 0.02 | 0 |

AGIS: alpha-glucosidase inhibitors, Alpha and Beta: combined alpha and beta blockers, ACEi: angiotensin-converting-enzyme inhibitors, ARB: angiotensin receptor blockers, A2RA: angiotensin II receptor blockers, DRI: dopamine reuptake inhibitor, Emphysema: percent of emphysema, FEV1: absolute forced expired volume in one second in millimeters, FEV1_pp: forced expiratory volume in one second in percent predicted using the Hankinson method, FVC: forced vital capacity, LASSO: least absolute shrinkage and selection operator, MAOI: monoamine oxidase inhibitors, NSAID: non-steroidal anti-inflammatory drugs, O3FAEE: omega-3 fatty acid ethyl esters, PPI: proton pump inhibitors, P1: phase 1 (baseline), P2: phase 2 (5-year follow up), PAI: plasminogen activator inhibitor-1, SSRI: selective serotonin reuptake inhibitor, SNRI: serotonin and norepinephrine reuptake inhibitors, SCAI: selective cholesterol absorption inhibitors, TCA: tricyclic and tetracyclic antidepressants.

a. Frequency of stability selection from knockoff method paired with Least absolute shrinkage and selection operator (LASSO) regression. Higher frequency from the stability selection means a particular variable is more likely to be a true signal. The frequency of stability selection ranges between 0 and 1. We considered frequency of stability selection>0 as having a signal.

**Appendix table 2: All selected 26 classes of medications associated with change of pulmonary outcomes at P1 and P2 separately**

| **Classes of Medications** | **Change of Emphysema selection a** | **Change of FEV1 selection a** | **Change of FEV1_pp selection a** | **Change of FVC selection a** |
| --- | --- | --- | --- | --- |
| P1 AGIS | 0 | 0.01 | 0 | 0 |
| P1 Anxiolytic-hypnotics | 0 | 0.01 | 0 | 0 |
| P1 Biguanides | 1 | 1 | 1 | 1 |
| P1 Diuretic | 0 | 0.1 | 0 | 0 |
| P1 DRI | 0 | 0.04 | 0 | 0 |
| P1 Incretin mimetics | 0.34 | 0.01 | 0.09 | 0 |
| P1 Mood stabilizers | 0.07 | 0.01 | 0 | 0.03 |
| P1 O3FAEE | 0 | 0.01 | 0 | 0 |
| P1 PPI | 0 | 0.01 | 0 | 0 |
| P1 Resins | 0.01 | 0 | 0 | 0 |
| P1 SCAI | 0.66 | 0 | 0 | 0 |
| P1 Statin combo | 0 | 0.01 | 0 | 0 |
| P1 Thiazolidinediones | 0 | 0.08 | 0 | 0 |
| P2 Alpha and Beta | 0 | 0.91 | 0.19 | 0.14 |
| P2 Antidepressants | 0.07 | 0 | 0.02 | 0 |
| P2 Beta blocker | 0 | 0.01 | 0 | 0 |
| P2 Central agonist | 0 | 1 | 0.99 | 0.81 |
| P2 Diuretic | 0.66 | 1 | 1 | 1 |
| P2 DRI | 0 | 0.09 | 0.04 | 0 |
| P2 H2 blocker | 0.16 | 0.75 | 0.03 | 0 |
| P2 Other antidepressants | 0.04 | 0.01 | 0 | 0 |
| P2 PPI | 0.1 | 0.01 | 0 | 0 |
| P2 Prostaglandin | 0 | 0.07 | 0.19 | 0 |
| P2 Resins | 0 | 0.02 | 0 | 0 |
| P2 SNRI | 0 | 0.01 | 0.08 | 0 |
| P2 TCA | 0.71 | 0.19 | 0.02 | 0.82 |

AGIS: alpha-glucosidase inhibitors, Alpha and Beta: combined alpha and beta blockers, DRI: dopamine reuptake inhibitor, Emphysema: percent of emphysema, FEV1: absolute forced expired volume in one second in millimeters, FEV1_pp: forced expiratory volume in one second in percent predicted using the Hankinson method, FVC: forced vital capacity, O3FAEE: omega-3 fatty acid ethyl esters, PPI: proton pump inhibitors, P1: phase 1 (baseline), P2: phase 2 (5-year follow up), SNRI: serotonin and norepinephrine reuptake inhibitors, SCAI: selective cholesterol absorption inhibitors, TCA: tricyclic and tetracyclic antidepressants.

a. Frequency of stability selection from knockoff method paired with Least absolute shrinkage and selection operator (LASSO) regression. Higher frequency from the stability selection means a particular variable is more likely to be a true signal. The frequency of stability selection ranges between 0 and 1. We considered frequency of stability selection>0 as having a signal.
